# Supplementary material for: Women Who Are Young, Non‐White, and with Lower Socioeconomic Status Report Higher Financial Toxicity up to 1 Year After Breast Cancer Surgery: A Mixed‐Effects Regression Analysis
Source: PubMed Central journal article supplement — Oncologist. 2020 Oct 12;26(1):e142–52. doi: 10.1002/onco.13544 (PMC7794185; doi:10.1002/onco.13544), 2020-10-12
Supplement: ONCO-26-e142-s001.pdf [file ONCO-26-e142-s001.pdf]

Supplemental Tables for:

Women who are young, non-white, with low SES report high financial toxicity up to 1 year from breast cancer surgery: mixed-effects regression analysis

Mary C Politi et al.

**Supplementary table 1. Bivariate test statistics and adjusted linear regression coefficients for the continuous out-of-pocket costs variable at each time point<sup>†</sup>**

|                                        | 1-week post-surgery          |                                              | 12-weeks post-surgery        |                                              | 1-year post-surgery          |                                              |
|----------------------------------------|------------------------------|----------------------------------------------|------------------------------|----------------------------------------------|------------------------------|----------------------------------------------|
|                                        | Bivariate statistic, p-value | Adjusted coeff. <sup>+^</sup> (95% CI)       | Bivariate statistic, p-value | Adjusted coeff. <sup>^</sup> (95% CI)        | Bivariate statistic, p-value | Adjusted coeff. <sup>^</sup> (95% CI)        |
| <b>Lower SES (vs. higher SES)</b>      | t=5.04, p<0.0001             | -1.12 (-1.91, -0.34)*                        | t=5.28, p<0.0001             | -1.26 (-2.06, -0.46)*                        | t=1.59, p=0.12               | -1.84 (-3.29, -0.39)*                        |
| <b>65 years and older (vs &lt; 65)</b> | t=6.03, p<0.0001             | -2.29 (-3.00, -1.58)*                        | t=3.11, p=0.002              | -1.18 (-1.89, -0.47)*                        | t=3.10, p=0.003              | -2.42 (-3.68, -1.15)                         |
| <b>Race/Ethnicity</b>                  | F=10.39, p<0.0001            | --                                           | F=19.8, p<0.0001             | --                                           | F=0.67, p=0.92               | --                                           |
| White, non-Hispanic                    | --                           | <i>referent</i>                              | --                           | <i>referent</i>                              | --                           | <i>referent</i>                              |
| Black, non-Hispanic                    | --                           | 0.09 (-1.17, 1.35)                           | --                           | 0.02 (-1.21, 1.26)                           | --                           | 2.50 (0.19, 4.81)*                           |
| Other                                  | --                           | -0.86 (-2.13, 0.41)                          | --                           | -1.02 (-2.23, 0.21)                          | --                           | 1.82 (-0.69, 4.34)                           |
| <b>Mastectomy (vs. Lumpectomy)</b>     | t=-1.15, p=0.25              | 0.44 (-0.45, 1.33)                           | t=0.18, p=0.89               | 0.43 (-0.52, 1.37)                           | t=-1.10, p=0.27              | 0.16 (-1.84, 2.15)                           |
| <b>Stage (I, II, or III)</b>           | F=0.49, p=0.61               | --                                           | F=0.41, p=0.66               | --                                           | F=0.31, p=0.73               | --                                           |
| Stage I                                | --                           | <i>referent</i>                              | --                           | <i>referent</i>                              | --                           | <i>referent</i>                              |
| Stage II                               | --                           | 0.19 (-0.61, 0.98)                           | --                           | 0.37 (-0.45, 1.19)                           | --                           | -0.04 (-1.65, 1.57)                          |
| Stage III                              | --                           | -0.29 (-3.20, 2.61)                          | --                           | 0.54 (-1.89, 2.96)                           | --                           | 2.92 (-3.66, 9.50)                           |
| <b>Site</b>                            |                              |                                              |                              |                                              |                              |                                              |
| Site 1                                 | --                           | <i>referent</i>                              | --                           | <i>referent</i>                              | --                           | <i>referent</i>                              |
| Site 2                                 | --                           | -0.96 (-2.26, 0.34)                          | --                           | -1.98 (-3.30, -0.67)*                        | --                           | -3.11 (-5.59, -0.63)*                        |
| Site 3                                 | --                           | -1.16 (-2.71, 0.39)                          | --                           | -1.51 (-3.10, 0.09)                          | --                           | -0.30 (-2.69, 2.09)                          |
| Site 4                                 | --                           | 0.45 (-0.45, 1.35)                           | --                           | 0.59 (-0.39, 1.57)                           | --                           | -0.42 (-1.90, 1.06)                          |
| <b>Random effect SD estimates (SE)</b> |                              |                                              |                              |                                              |                              |                                              |
| Clinic                                 | --                           | 3.14e <sup>-23</sup> (6.34e <sup>-22</sup> ) | --                           | 1.50e <sup>-18</sup> (4.60e <sup>-17</sup> ) | --                           | 1.26e <sup>-20</sup> (1.79e <sup>-16</sup> ) |

|         |    |                                              |    |             |    |                                              |
|---------|----|----------------------------------------------|----|-------------|----|----------------------------------------------|
| Surgeon | -- | 2.30e <sup>-23</sup> (2.45e <sup>-22</sup> ) | -- | 0.06 (0.30) | -- | 7.82e <sup>-20</sup> (1.12e <sup>-18</sup> ) |
|---------|----|----------------------------------------------|----|-------------|----|----------------------------------------------|

<sup>^</sup>Log coefficient adjusted for participant SES (high vs. low), age ( $\geq 65$  vs. less than 65), race (white vs. black vs. other), surgery choice (breast conserving surgery vs. mastectomy), cancer stage (I vs. II vs. III), and study site as fixed effects and surgeon and clinic as random effects.

\*p<0.05

<sup>+</sup>Abbreviations: Coeff. = coefficient; SE = Standard Error; SES = Socioeconomic Status; CI = Confidence Interval; SD = Standard Deviation

**Supplemental table 2. Adjusted outputs from longitudinal models accounting for patient as a random effect**

|                                         | Out-of-Pocket Costs<br>(Zero vs. Non-Zero) | Out-of-Pocket Costs<br>(Continuous)               | Financial Toxicity                            |
|-----------------------------------------|--------------------------------------------|---------------------------------------------------|-----------------------------------------------|
|                                         | Adjusted <sup>^</sup> OR<br>(95% CI)       | Adjusted <sup>^</sup> Log Coefficient<br>(95% CI) | Adjusted <sup>^</sup> Coefficient<br>(95% CI) |
| <b>Lower SES (vs. higher SES)</b>       | 0.17 (0.07, 0.45)*                         | -1.41 (-2.06, -0.76)*                             | 1.23 (0.39, 2.07)*                            |
| <b>65 years and older (vs. &lt; 65)</b> | 0.18 (0.08, 0.44)*                         | -1.70 (-2.28, -1.11)*                             | -2.67 (-3.42, -1.92)*                         |
| <b>Race/Ethnicity</b>                   |                                            |                                                   |                                               |
| White, non-Hispanic                     | <i>referent</i>                            | <i>referent</i>                                   | <i>referent</i>                               |
| Black, non-Hispanic                     | 1.76 (0.43, 7.24)                          | 0.31 (-0.71, 1.32)                                | 2.04 (0.73, 3.35)*                            |
| Other                                   | 0.44 (0.11, 1.74)                          | -0.65 (-1.68, -0.38)                              | 1.77 (0.44, 3.09)*                            |
| <b>Mastectomy (vs. Lumpectomy)</b>      | 1.59 (0.54, 4.73)                          | 0.53 (-0.23, 1.28)                                | -0.35 (-1.31, 0.61)                           |
| <b>Stage (I, II, or III)</b>            |                                            |                                                   |                                               |
| Stage I                                 | <i>referent</i>                            | <i>referent</i>                                   | <i>referent</i>                               |
| Stage II                                | 1.08 (0.42, 2.79)                          | 0.23 (-0.44, 0.89)                                | 0.94 (0.10, 1.77)*                            |
| Stage III                               | 0.40 (0.02, 7.38)                          | -0.35 (-2.51, 1.81)                               | 1.98 (-0.63, 4.60)                            |
| <b>Site</b>                             |                                            |                                                   |                                               |
| Site 1                                  | <i>referent</i>                            | <i>referent</i>                                   | <i>referent</i>                               |
| Site 2                                  | 0.21 (0.05, 0.90)*                         | -1.57 (-2.62, -0.53)*                             | -1.76 (-3.11, -0.41)*                         |
| Site 3                                  | 0.13 (0.02, 0.71)*                         | -1.19 (-2.44, 0.05)                               | -1.50 (-3.08, 0.08)                           |
| Site 4                                  | 1.04 (0.37, 2.94)                          | 0.30 (-0.43, 1.02)                                | -1.05 (-1.98, -0.12)*                         |
| <b>Random effects estimates (SE)</b>    |                                            |                                                   |                                               |
| Clinic                                  | 8.65e <sup>-9</sup> (0.21)                 | 7.35e <sup>-16</sup> (1.41e <sup>-14</sup> )      | 5.54e <sup>-20</sup> (NA)                     |
| Surgeon                                 | 9.47e <sup>-10</sup> (0.24)                | 2.77e <sup>-17</sup> (3.95e <sup>-16</sup> )      | 1.44e <sup>-19</sup> (1.68e <sup>-18</sup> )  |
| Patient                                 | 2.32 (0.41)                                | 4.55 (0.64)                                       | 9.80 (0.96)                                   |

<sup>^</sup>Adjusted for participant SES (high vs. low), age ( $\geq 65$  vs. less than 65), race (white vs. black vs. other), surgery choice (breast conserving surgery vs. mastectomy), cancer stage (I vs. II vs. III), and study site as fixed effects and surgeon, clinic, and patient as random effects.

\*p<0.05

**Supplemental table 3. Participant characteristics comparing those who completed the one-year follow up assessment versus those who did not**

| Characteristic, n ()        | Did not complete 1-year survey<br>(n=267) | Completed 1-year survey<br>(n=128) | p-value <sup>^</sup> |
|-----------------------------|-------------------------------------------|------------------------------------|----------------------|
| <b>Socioeconomic Status</b> |                                           |                                    | 0.17                 |
| Lower                       | 169 (63.3)                                | 90 (70.3)                          |                      |
| Higher                      | 98 (36.7)                                 | 38 (29.7)                          |                      |
| <b>Age</b>                  |                                           |                                    | 0.40                 |
| Less than 65                | 160 (59.9)                                | 71 (55.5)                          |                      |
| 65 and older                | 107 (40.1)                                | 57 (44.5)                          |                      |
| <b>Race</b>                 |                                           |                                    | 0.001                |
| White, non-Hispanic         | 155 (58.1)                                | 99 (77.3)                          |                      |
| Black, non-Hispanic         | 45 (16.9)                                 | 10 (7.8)                           |                      |
| Other                       | 60 (22.5)                                 | 18 (14.1)                          |                      |
| Missing                     | 7 (2.6)                                   | 1 (0.8)                            |                      |
| <b>Surgery Choice</b>       |                                           |                                    | 0.015                |
| Lumpectomy                  | 202 (75.7)                                | 111 (86.7)                         |                      |
| Mastectomy                  | 63 (23.6)                                 | 17 (13.3)                          |                      |
| Missing                     | 2 (0.7)                                   | 0 (0.0)                            |                      |
| <b>Cancer Stage</b>         |                                           |                                    | 0.21                 |
| Stage I                     | 176 (65.9)                                | 94 (73.4)                          |                      |
| Stage II                    | 76 (28.5)                                 | 33 (25.8)                          |                      |
| Stage III                   | 9 (3.4)                                   | 1 (0.8)                            |                      |
| Missing                     | 6 (2.2)                                   | 0 (0.0)                            |                      |

<sup>^</sup>Chi-square tests used to test for statistical differences between groups.
